# Supplementary material for: Transformation of starphenes into amorphous graphene nanoribbons with attached carbon chains under electron irradiation
Source: Royal Society of Chemistry journal article supplement (doi:10.1039/d5cp00507h), 2025-01-01
Supplement: d5cp00507h1.pdf [file d5cp00507h1.pdf]

## Supplementary Information for

### Transformation of starphenes into amorphous graphene nanoribbons with attached carbon chains under electron irradiation

*Alexander S. Sinitsa<sup>a,b</sup>, Yulia G. Polynskaya<sup>a</sup>, Yegor M. Kedalo<sup>a,b,c</sup>, Andrey A. Knizhnik<sup>a,b</sup> and Andrey M. Popov<sup>d</sup>*

<sup>a</sup> Kintech Lab Ltd., 3rd Khoroshevskaya Street 12, Moscow 123298, Russia;

<sup>b</sup> National Research Centre “Kurchatov Institute”, Kurchatov Square 1, Moscow 123182, Russia;

<sup>c</sup> Moscow Institute of Physics and Technology, 9 Institutskiy per., Dolgoprudny 141700, Russia;

<sup>d</sup> Institute for Spectroscopy of Russian Academy of Sciences, Fizicheskaya Street 5, Troitsk, Moscow 108840, Russia.

#### Contents

**p. S1:** Simulated structure evolution of the C<sub>88</sub>H<sub>46</sub> starphene in vacuum under 45 keV electron irradiation in HRTEM

**p. S3:** Description of the video files attached

# **Simulated structure evolution of the $C_{88}H_{46}$ starphene in vacuum under 45 keV electron irradiation in HRTEM**

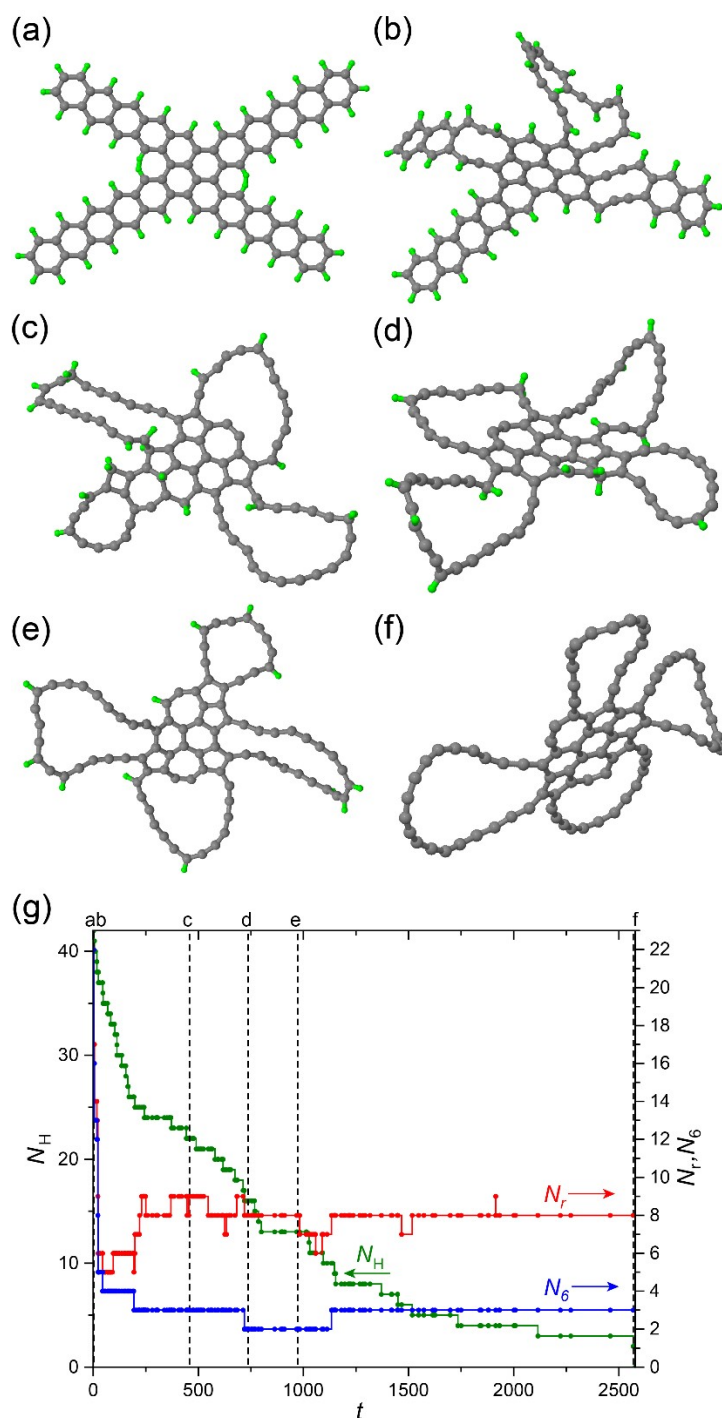

**Figure S1.** (a)–(f) Simulated structure evolution of the  $C_{88}H_{46}$  starphene in vacuum under 45 keV electron irradiation in HRTEM: (a) 0 s, (b) 2.36 s, (c) 458.1 s, (d) 736.7 s, (e) 972.6 s and (f) 2568.2 s. The direction of the electron beam is out of the page. Carbon and hydrogen atoms are colored grey and green, respectively. (g) Calculated number of hydrogen atoms remaining attached to in the molecule,  $N_H$  (green line), , total number of 5-, 6-, 7-, and 8-rings,  $N_r$  (red line, right axis), and and number of hexagons in the molecule structure,  $N_6$  (red line, right axis), and and number of hexagons in the molecule structure,  $N_6$  (blue line), as functions of time  $t$  in the same simulation run. The moments of time corresponding to structures (a)–(f) are shown using vertical dashed lines.

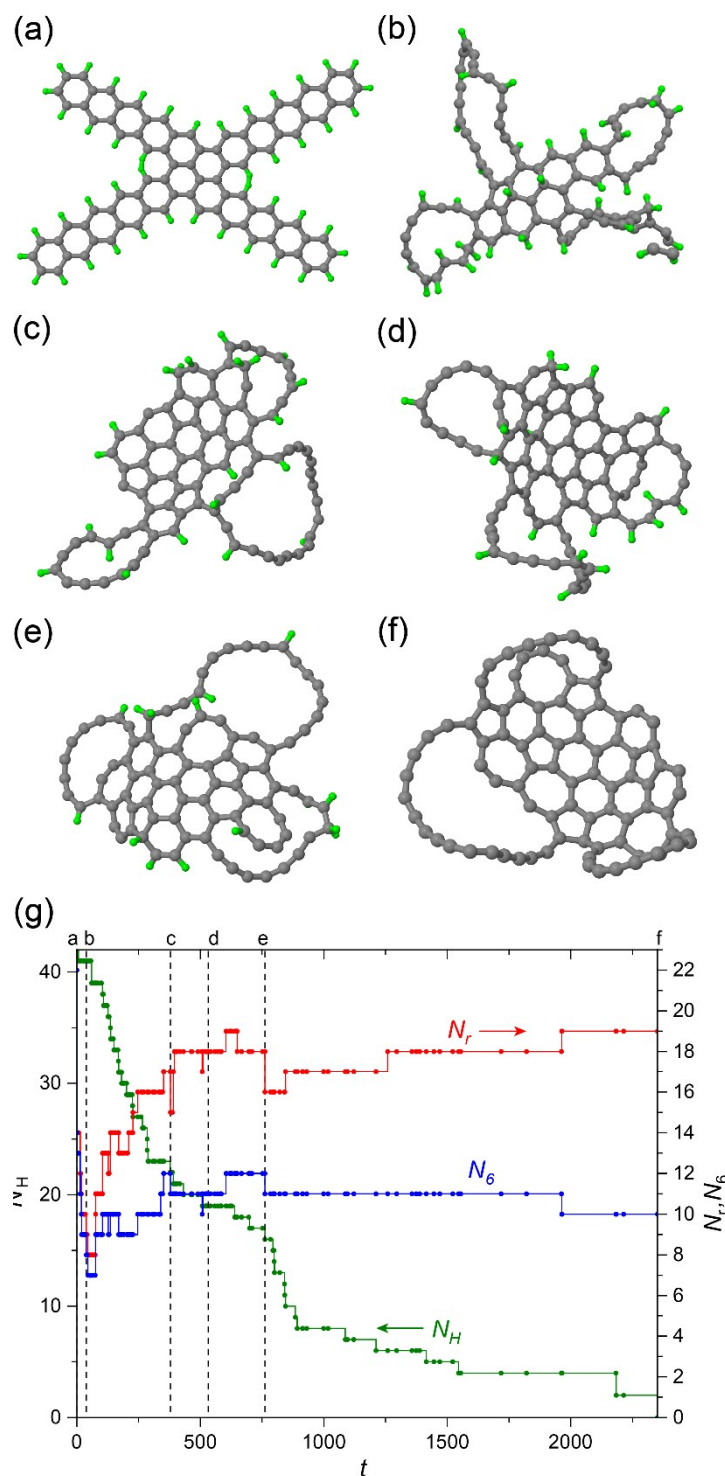

**Figure S2.** (a)–(f) Simulated structure evolution of the  $C_{88}H_{46}$  starphene in vacuum under 45 keV electron irradiation in HRTEM: (a) 0 s, (b) 38.1 s, (c) 378.9 s, (d) 533.7 s, (e) 762.0 s and (f) 2351.4. s. The direction of the electron beam is out of the page. Carbon and hydrogen atoms are colored grey and green, respectively. (g) Calculated number of hydrogen atoms remaining attached to in the molecule,  $N_H$  (green line), , total number of 5-, 6-, 7-, and 8-rings,  $N_r$  (red line, right axis), and and number of hexagons in the molecule structure,  $N_6$  (blue line), as functions of time  $t$  in the same simulation run. The moments of time corresponding to structures (a)–(f) are shown using vertical dashed lines.

## Description of the video files attached

Video files “vid\_cplm\_graphene\_45kev.avi” and “vid\_agnr\_graphene\_45kev.avi” show examples of the structure evolution observed in the MD simulations during the formation of carbon propeller-like molecule and amorphous graphene nanoribbon with attached short carbon chains, respectively, from the  $C_{88}H_{46}$  starphene on the graphene surface in HRTEM under electron irradiation with the electron kinetic energy of 45 keV. In this videos, all carbon and hydrogen atoms are colored in grey and green, respectively. The total time in HRTEM (converted from the MD simulation time) as well as the total numbers of carbon and hydrogen atoms NC and NH are also given at the bottom of the frame.

### MD Simulation by CompuTEM (45 keV)

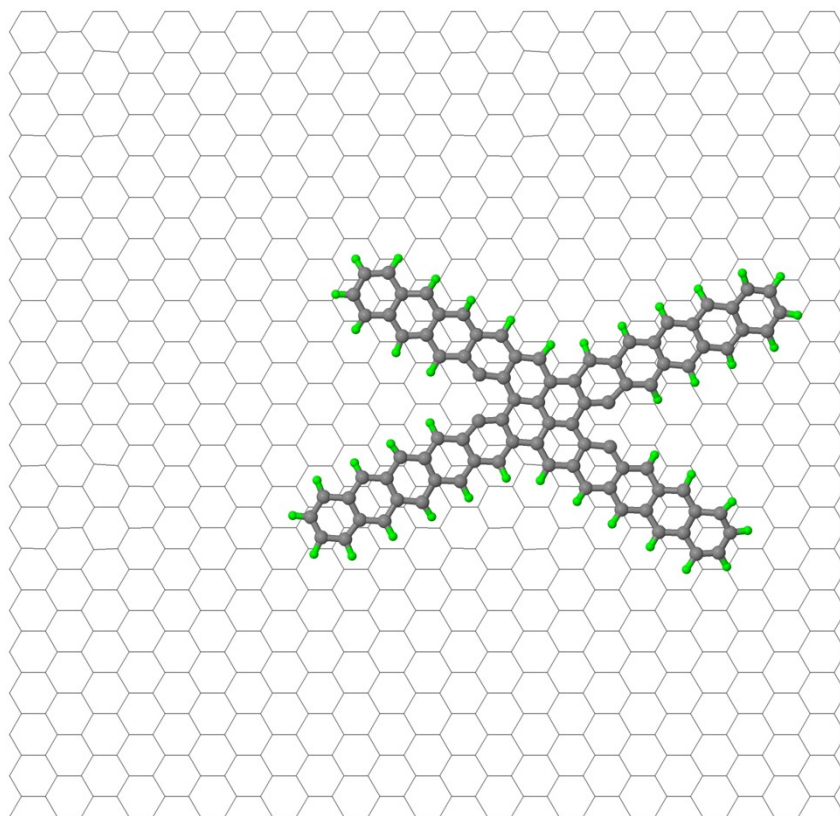

**TIME 0.0 s; NC = 1048; NH =42**

Jmol
